# Supplementary material for: P1 and P2 protein heterodimer binding to the P0 protein of Saccharomyces cerevisiae is relatively non-specific and a source of ribosomal heterogeneity
Source: PubMed Central journal article supplement — Nucleic Acids Res. 2012 Jan 24;40(10):4520–9. doi: 10.1093/nar/gks036 (PMC3378876; doi:10.1093/nar/gks036), 2012-01-24
Supplement: supp_gks036_nar-02481-r-2011-File008.pdf [file supp_gks036_nar-02481-r-2011-File008.pdf]

Supplementary Data to

P1 AND P2 PROTEIN HETERODIMER BINDING TO THE P0 PROTEIN OF  
*Saccharomyces cerevisiae* IS RELATIVELY NON-SPECIFIC AND A SOURCE OF  
RIBOSOMAL HETEROGENEITY

David Cárdenas, Jesús Revuelta-Cervantes, Antonio Jiménez-Díaz, Hendricka  
Camargo, Miguel Remacha and Juan P. G. Ballesta

Centro de Biología Molecular Severo Ochoa, Consejo Superior de Investigaciones  
Científicas and Universidad Autónoma de Madrid, 28049 Madrid

MATERIALS AND METHODS

**Strains**

*Saccharomyces cerevisiae* strains used are listed in Table S1. Conditional P0 null strains (DGP0 strains) derived from D46, D47, D56 and D57, were obtained by substituting the *RPP0* genomic copy by a copy under the control of the GAL1 promoter, as previously described for the parental W303 strain (33), although in this case the genetic marker used for selection was the kanamycin resistance gene Kan<sup>r</sup>.

| Table 1. Strains used in this work |                                                                                                         |           |
|------------------------------------|---------------------------------------------------------------------------------------------------------|-----------|
| Strain                             | Genotype                                                                                                | Reference |
| W303–1b                            | MAT $\alpha$ , <i>leu2-3,112 trp1-1 his3-11,15 ura3-1, ade2-1, can1-100</i> .                           | (49)      |
| D46                                | MAT $\alpha$ , <i>RPP1B::TRP1, RPP2A::URA3, leu2-3,112, his3-11,15 can1-100</i> .                       | (30)      |
| D47                                | MAT $\alpha$ , <i>RPP1A::LEU2, RPP2A::URA3, his3-11,15, trp1-1, can1-100</i> .                          | (30)      |
| D56                                | MAT $\alpha$ , <i>RPP1B::TRP1, RPP2B::HIS3, ura3-1, leu2-3,112, can1-100</i> .                          | (30)      |
| D57                                | MAT $\alpha$ , <i>RPP1A::LEU2, RPP2B::HIS3, ura3-1, trp1-1, can1-100</i> .                              | (30)      |
| W303dGP0                           | MAT $\alpha$ , <i>leu2-3,112 trp1-1 his3-11,15 ura3-1, ade2-1, can1-100, RPP0::URA3-GAL1-RPP0</i>       | (33)      |
| D46dGP0                            | MAT $\alpha$ , <i>RPP1B::TRP1, RPP2A::URA3, leu2-3,112, his3-11,15 can1-100, RPP0::KanMX4-GAL1-RPP0</i> | This work |
| D47dGP0                            | MAT $\alpha$ , <i>RPP1A::LEU2, RPP2A::URA3, his3-11,15, trp1-1, can1-100 RPP0:: KanMX4-GAL1-RPP0</i>    | This work |
| D56dGP0                            | MAT $\alpha$ , <i>RPP1B::TRP1, RPP2B::HIS3, ura3-1, leu2-3,112, can1-100 RPP0:: KanMX4-GAL1-RPP0</i>    | This work |
| D57dGP0                            | MAT $\alpha$ , <i>RPP1A::LEU2, RPP2B::HIS3, ura3-1, trp1-1, can1-100 RPP0:: KanMX4-GAL1-RPP0</i>        | This work |

| Table S2. Plasmids used in the work |                                                   |           |
|-------------------------------------|---------------------------------------------------|-----------|
| Plasmid                             | Characteristics                                   | Reference |
| pFL36                               | LEU2, ARS-CEN6, pMB1 ori, <i>Amp</i> <sup>R</sup> | (34)      |
| pFL36-P0                            | pFL36 encoding protein P0                         | This work |
| pFL36-P0ΔA                          | pFL36 encoding P0ΔA                               | This work |
| pFL36-P0ΔB                          | pFL36 encoding protein P0ΔB                       | This work |
| pFL36-P0ΔAB                         | pFL36 encoding protein P0ΔAB                      | This work |
| pFL37                               | HIS3, ARS-CEN6, pMB1 ori, <i>Amp</i> <sup>R</sup> | (50)      |
| pFL37-P0                            | pFL37 encoding protein P0                         | This work |
| pFL37-P0ΔA                          | pFL37 encoding protein P0ΔA                       | This work |
| pFL37-P0ΔB                          | pFL37 encoding protein P0ΔB                       | This work |
| pFL37-P0ΔAB                         | pFL37 encoding protein P0ΔAB                      | This work |
| pFL38                               | URA3, ARS-CEN6, pMB1 ori, <i>Amp</i> <sup>R</sup> | (34)      |
| pFL38-P0                            | pFL38 encoding protein P0                         | This work |
| pFL38-P0ΔA                          | pFL38 encoding protein P0ΔA                       | This work |
| pFL38-P0ΔB                          | pFL38 encoding protein P0ΔB                       | This work |
| pFL38-P0ΔAB                         | pFL38 encoding protein P0ΔAB                      | This work |
| pFL39                               | TRP1, ARS-CEN6, pMB1 ori, <i>Amp</i> <sup>R</sup> | (34)      |
| pFL39-P0                            | pFL39 encoding protein P0                         | This work |
| pFL39-P0ΔA                          | pFL39 encoding protein P0ΔA                       | This work |
| pFL39-P0ΔB                          | vpFL39 encoding protein P0ΔB                      | This work |
| pFL39-P0ΔAB                         | pFL39 encoding protein P0ΔAB                      | This work |

| Table S3. Oligonucleotides used to construct the plasmids used in this work |                                                  |
|-----------------------------------------------------------------------------|--------------------------------------------------|
| Deleted Site                                                                | Sequence                                         |
| P0A3                                                                        | 5'-CGGTCAAGTGTTACCTTGCCATCTGTCG-3'               |
| P0A4                                                                        | 5'-CGACAGATGGCAAGGTGAACACTTGACCG-3'              |
| P0B3                                                                        | 5'-CTCTTTGGCTATTGGTTACGAAATTGAAGATTTGGTTGA C-3'  |
| P0B4                                                                        | 5'-GTCAACCAAATCTTCAATTTTCGTAACCAATAGCCAAAGA G-3' |
| P0AB1                                                                       | 5'-CGACAACGGTCAAGTGTTTCGAAATTGAAGATTTGGTTGA C-3' |
| P0A2                                                                        | 5'-GTCAACCAAATCTTCAATTTTCGAACACTTGACCGTTGTCG-3'  |
| P0N4                                                                        | 5'-ATT GAA ATT GTT TCT GAT GTC AAG-3'            |
| P0taaXho                                                                    | 5'-GAC TCG AGA TCG AAT AAA CCG AAA CCC ATG-3'    |

### Cell fractionation and ribosome preparation

Exponentially grown *S. cerevisiae* cells (A600 ~ 0,5) were resuspended in buffer 1 (10 mM Tris-HCl, pH 7.4, 20 mM KCl, 12.5 mM MgCl<sub>2</sub>, 1 mM DTT) supplemented with a mixture of protease inhibitors (aprotinine, antipain, leupeptine, chymostatin, pepstatine and PMSF at 10 μg/ml final concentration) and broken by shaking with glass beads in a FastPrep. The supernatant fraction S30 was obtained by centrifuging the extract at 30000 x g for 15 min at 4°C. Ribosomes were prepared from the S30 by centrifugation at 100000 x g for 2 h at 4°C, yielding a ribosomal pellet and the supernatant fraction S-100. The ribosomes were washed by centrifugation through a

discontinuous 20% and 40% sucrose gradient in buffer 2 (20 mM Tris-HCl, pH 7.4, 100 mM MgCl<sub>2</sub>, 0.5 M NH<sub>4</sub>Cl and 5 mM 2-mercaptoethanol) and resuspended in buffer 1. For activity tests, the ribosomes and fraction S-100 were obtained according to (51).

### **Analysis of polysomes and ribosomal subunits by sucrose gradients**

*S. cerevisiae* cells were grown in YEPD medium then washed with buffer 3 (10 mM Tris-HCl pH 7.4, 80 mM KCl, 10 mM MgCl<sub>2</sub> and 100 µg/ml cycloheximide, 1% DTT). After breaking cells in Fastprep equipment, total extracts were obtained by centrifugation at 13,000 rpm for 30 min at 4°C, and the supernatant loaded onto a linear 10 to 50% (w/v) sucrose gradient in buffer 2 and centrifuged in a SW40Ti rotor at 39,000 rpm for 3:45 h at 4°C. Gradients were fractionated in a Teledyne ISCO 185 density gradient fractionator, and absorbance at 260 nm was monitored continuously by using an ISCO UA-5 UV monitor.

## **RESULTS AND DISCUSSION**

### **Effect of truncated P0 expression on the accumulation of P1/P2 proteins**

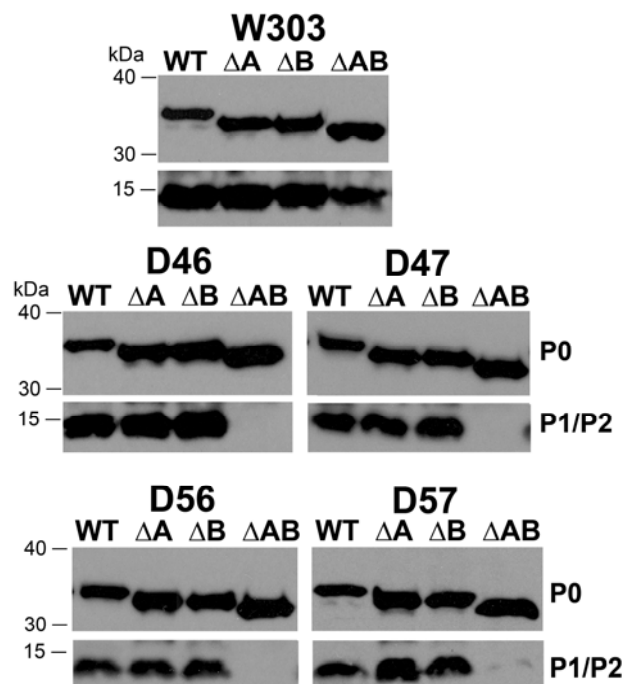

Fig S1.- Truncated P0 proteins expressed in the stalk mutant strains of *S. cerevisiae*. Strains W303dGP0, D46dGP0, D47dGP0, D56dGP0 and D57dGP0 were transformed with the corresponding plasmid to express wild-type P0, P0 lacking site A (ΔA), P0 lacking site B (ΔB) and P0 lacking both sites (ΔAB). The transformed cells were grown in glucose medium and the total cell extracts were resolved by SDS-PAGE. The P0 proteins were detected in immunoblots probed with antibody 3BH5(ppA-2), which cross-reacts with the C-terminal domain of all the stalk proteins (36).

### Effect of P0 truncation on cell growth.

The failure to observe any alteration in the growth of strains D46 and D57 when a P0 acidic protein binding site is absent (Fig S2) indicates that P0 truncation does not affect protein function in a detectable way.

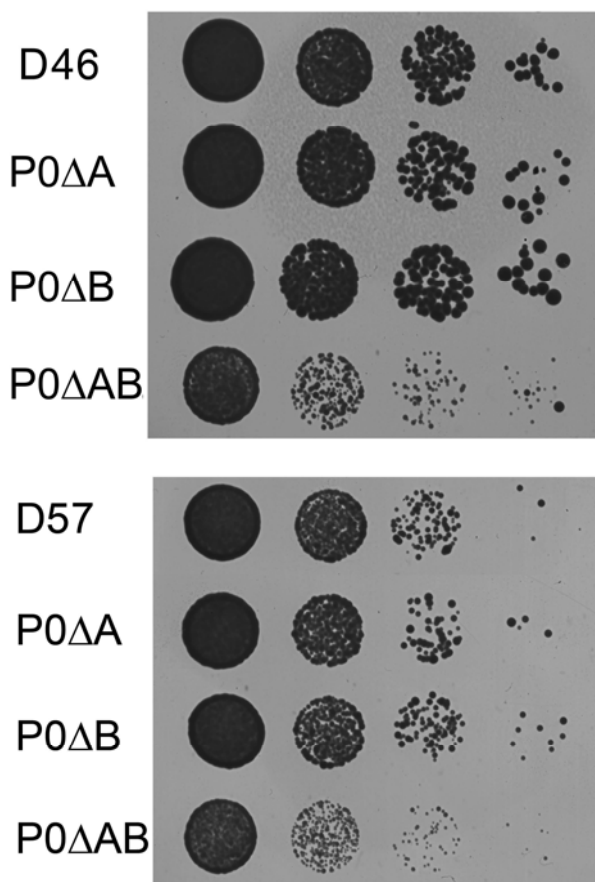

**Fig S2.**- Growth of *S. cerevisiae* strains expressing truncated P0 proteins lacking the P1/P2 binding sites. Serial dilutions of cells from the double D46 and D57 mutants, as well as that of the same strains expressing the different truncated P0 proteins were grown on YEPD agar plates at 30°C for four days.

### Proposed model for stalk pentamer assembly

The assembly of the P1/P2 protein into the stalk mainly yields a P1 $\alpha$ /P2 $\beta$ -P0-P1 $\beta$ /P2 $\alpha$  pentamer, as shown in Fig S3. However, since the two P0 binding sites A and B can bind all possible P1/P2 heterodimers (Fig 6), a small proportion of ribosomes could carry alternative combinations of acidic proteins (as illustrated in Fig S3 for a ribosome carrying two copies of the P1 $\beta$ /P2 $\alpha$ ). Indeed, since a minor fraction of P1 $\alpha$ /P2 $\beta$  can bind to site B in the W303 strain (Fig 6A), the generation of ribosomes carrying two copies of this heterodimer is also possible, which is consistent with the cross-linking data showing the formation of P protein homodimers (29). Hence, there is some heterogeneity in the ribosome population that can be controlled by the cell regulating the amount of each acidic protein expressed in any given metabolic condition.

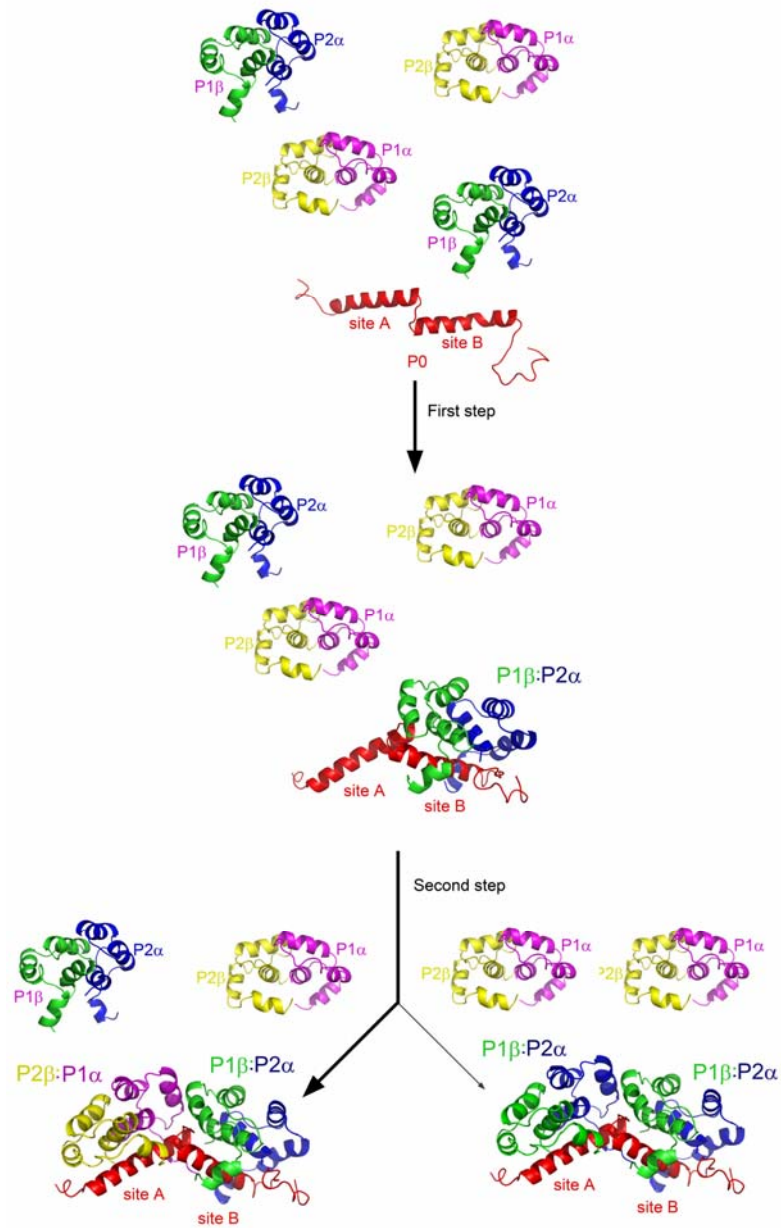

Fig S3. Proposed model for *S. cerevisiae* ribosomal stalk assembly. The width of the arrows in the second step suggests the relative probability of the two alternative pathways occurring. The structure of the protein complexes is based on previous models of the stalk structure (13).

## References

13. Camargo, H., Nusspaumer, G., Abia, D., Briceno, V., Remacha, M. and Ballesta, J.P. (2011) The amino terminal end determines the stability and assembling capacity of eukaryotic ribosomal stalk proteins P1 and P2. *Nucleic Acids Res*, **39**, 3735-3743.
29. Qiu, D., Parada, P., Marcos, A.G., Cardenas, D., Remacha, M. and Ballesta, J.P. (2006) Different roles of P1 and P2 *Saccharomyces cerevisiae* ribosomal stalk proteins revealed by cross-linking. *Mol. Microbiol.*, **62**, 1191-1202.
30. Remacha, M., Santos, C., Bermejo, B., Naranda, T. and Ballesta, J.P.G. (1992) Stable binding of the eukaryotic acidic phosphoproteins to the ribosome is not an absolute requirement for *in vivo* protein synthesis. *J. Biol. Chem.*, **267**, 12061-12067.
33. Santos, C. and Ballesta, J.P. (1994) Ribosomal protein P0, contrary to phosphoproteins P1 and P2, is required for ribosome activity and *Saccharomyces cerevisiae* viability. *J. Biol. Chem.*, **269**, 15689-15696.
34. Bonneaud, N., Ozier-Kalogeropoulos, O., Li, G., Labouesse, M., Minvielle-Sebastia, L. and Lacroute, F. (1991) A family of low and high copy replicative, integrative and single-stranded *S. cerevisiae*/*E. coli* shuttle vectors. *Yeast*, **7**, 609-615.
36. Vilella, M.D., Remacha, M., Ortiz, B.L., Mendez, E. and Ballesta, J.P.G. (1991) Characterization of the yeast acidic ribosomal phosphoproteins using monoclonal antibodies. Proteins L44/L45 and L44' have different functional roles. *Eur. J. Biochem.*, **196**, 407-414.
49. Rothstein, R.J. (1983) One-step gene disruption in yeast. *Methods Enzymol.*, **101**, 202-211.
50. Rodriguez-Gabriel, M.A., Remacha, M. and Ballesta, J.P.G. (2000) The RNA interacting domain but not the protein interacting domain is highly conserved in ribosomal protein P0. *J. Biol. Chem.*, **275**, 2130-2136.
51. Sanchez-Madrid, F., Reyes, R., Conde, P. and Ballesta, J.P.G. (1979) Acidic ribosomal proteins from eukaryotic cells. Effect on ribosomal functions. *Eur. J. Biochem.*, **98**, 409-416.
